# Supplementary material
Source: PubMed Central journal article supplement (PMC3412361)
Supplement: NIHMS383487-supplement-01.pdf [file NIHMS383487-supplement-01.pdf]

**Supplemental Table 1.** GenBank sequences used in this study.

| <b>Gene</b> | <b>Accession numbers</b>             | <b>No. of sequences</b> |
|-------------|--------------------------------------|-------------------------|
| F           | AY145287-AY145301                    | 15                      |
|             | AY304360-AY304362                    | 3                       |
|             | AY622381                             | 1                       |
|             | EF051124                             | 1                       |
|             | EF081369                             | 1                       |
|             | EF589610                             | 1                       |
|             | EU857542-EU857610                    | 69                      |
|             | JN184399-JN184402                    | 4                       |
|             | JQ413388-JQ413389, JQ413391-JQ413412 | 25                      |
|             | <b>Total no. of F sequences</b>      | <b>120</b>              |
| N           | AB503857                             | 1                       |
|             | AF371356-AF371363                    | 8                       |
|             | AF479257-AF479259                    | 3                       |
|             | AJ439504                             | 1                       |
|             | AM056029-AM056039                    | 11                      |
|             | AM056048                             | 1                       |
|             | AY241585                             | 1                       |
|             | AY251035-AY251051                    | 17                      |
|             | AY256873-AY256875                    | 3                       |
|             | AY355319-AY355336                    | 18                      |
|             | AY525843                             | 1                       |
|             | AY530090-AY530095                    | 6                       |
|             | AY953095-AY953103                    |                         |
|             | DD266411                             | 1                       |
|             | DQ275669                             | 1                       |
|             | DQ318787                             | 1                       |
|             | DQ450606-DQ450656                    | 51                      |
|             | DQ453044-DQ453108                    | 65                      |
|             | DQ453109-DQ453115                    | 7                       |
|             | DQ518967                             | 1                       |
|             | DQ843658, DQ843659                   | 2                       |
|             | EF165589                             | 1                       |
|             | EF415637                             | 1                       |
|             | EF535506                             | 1                       |
|             | EF549622-EF549667                    | 46                      |
|             | EF606704-EF606726                    | 23                      |
|             | EU179266-EU179271                    | 6                       |
|             | EU189115-EU189131                    | 17                      |
|             | FJ168778, FJ168779                   | 2                       |
|             | FJ554879-FJ554886                    | 8                       |
|             | GQ153651                             | 1                       |
|             | GQ888746-GQ888761                    | 21                      |
|             | HM124518-HM124528                    | 11                      |
|             | HM173093-HM173096                    | 4                       |
|             | HM197719                             | 1                       |
|             | JF723501-JF723505                    | 5                       |
|             | JN184399-JN184402                    | 4                       |
|             | <b>Total no. of N sequences</b>      | <b>352</b>              |



# Supplemental Figure 2

38327221 {AY355321} TN96-12  
149133018 {EF415637}  
38327223 {AY355322}  
30088912 {AY256873}  
30088914 {AY256874}  
30088916 {AY256875}  
38327225 {AY355323} AY530092  
109246242 {DD266411}  
38327219 {AY355320}  
38327217 {AY355319} TN94-49  
38327231 {AY355326} AY530091  
AY530093  
AY530090  
AY530095  
BJ1887  
QZ01  
NL00-17  
JPN03-1  
38327229 {AY355325}  
38327227 {AY355324}  
NL-N for  
NL-N 2 for  
UR for  
UR 2 for  
TN98-242  
AY530089  
AY530094  
NL99-1  
38327235 {AY355328}  
38327243 {AY355332}  
38327239 {AY355330}  
38327241 {AY355331}  
38327237 {AY355329}  
38327245 {AY355333}  
38327247 {AY355334}  
TN99-419  
TW05-00125  
38327249 {AY355335}  
NL94-1  
38327251 {AY355336} Sabana  
334738477 {JF723503}  
334738475 {JF723502}  
334738481 {JF723505}  
334738479 {JF723504}  
BJ1816

```
T G A G T G A T T T A T C A T A C A A G C A T G C T A T A T T A A A A G A G T C T C A G T A
T G A G T G A T T T A T C A T A C A A G C A T G C T A T A T T A A A A G A G T C T C A G T A
T G A G T G A T T T A T C A T A C A A G C A T G C T A T A T T A A A A G A G T C T C A G T A
T G A G T G A T T T A T C A T A C A A G C A T G C T A T A T T A A A A G A G T C T C A G T A
----- G C T A T A T T A A A A G A G T C T C A G T A
----- G C T A T A T T A A A A G A G T C T C A G T A
----- G C T A T A T T A A A A G A G T C T C A G T A
T G A G T G A T C T A T C A T A C A A G C A T G C T A T A T T A A A A G A G T C T C A G T A
T G A G T G A T C T A T C A T A C A A G C A T G C T A T A T T A A A A G A G T C T C A G T A
T G A G T G A T T T A T C A T A C A A G C A T G C T A T A T T A A A A G A G T C T C A G T A
T G A G T G A T T T A T C A T A C A A G C A T G C T A T A T T A A A A G A G T C T C A G T A
T G A G T G A T C T A T C A T A C A A G C A T G C T A T A C T A A A A G A G T C T C A G T A
T G A G T G A T C T A T C A T A C A A G C A T G C T A T A T T A A A A G A G T C T C A G T A
T G A G T G A T C T A T C A T A C A A G C A T G C T A T A T T A A A A G A G T C T C A G T A
T G A G T G A T C T A T C A T A C A A G C A T G C T A T A T T A A A A G A G T C T C A G T A
T G A G T G A T C T A T C A T A C A A G C A T G C T A T A T T A A A A G A G T C T C A G T A
T G A G T G A T C T A T C A T A C A A G C A T G C T A T A T T A A A A G A G T C T C A G T A
T G A G T G A T C T A T C A T A C A A G C A T G C T A T A T T A A A A G A G T C T C A G T A
----- C A T A T A A G C A T G C T A T A T T A A A A G A G T C T C -----
----- C A T A Y A A R C A T G C T A T A T T A A A A G A G T C T C -----
----- C A T C G T A T A T T A A A A G A G T C T C A -----
----- C A T G C T A T A T T A A A A G A G T C T C A -----
T A A G T G A T C T A T C A T A T A A A C A T G C T A T A T T A A A A G A G T C T C A A T A
T A A G T G A T C T G T C A T A T A A A C A T G C T A T A T T A A A A G A G T C T C A A T A
T A A G T G A T C T G T C A T A T A A A C A T G C T A T A T T A A A A G A G T C T C A A T A
T A A G T G A T C T A T C A T A T A A A C A T G C T A T A T T A A A A G A G T C T C A A T A
T A A G T G A T C T A T C A T A T A A A C A T G C T A T A T T A A A A G A G T C T C A A T A
T A A G T G A T C T G T C A T A T A A A C A T G C T A T A T T A A A A G A G T C T C A A T A
T A A G T G A T C T G T C A T A T A A A C A T G C T A T A T T A A A A G A G T C T C A A T A
T A A G T G A T C T G T C A T A T A A A C A T G C T A T A T T A A A A G A G T C T C A A T A
T A A G T G A T C T G T C A T A C A A A C A T G C T A T A T T A A A A G A G T C T C A A T A
T A A G T G A T C T G T C A T A C A A A C A T G C T A T A T T A A A A G A G T C T C A A T A
T A A G T G A T C T G T C A T A T A A A C A T G C T A T A T T A A A A G A G T C T C A A T A
T A A G T G A T C T G T C A T A T A A A C A T G C T A T A T T A A A A G A G T C T C A A T A
----- G C T A T A T T A A A A G A G T C T C A A T A
T A A G T G A T C T G T C A T A T A A A C A C G C T A T A T T A A A A G A G T C T C A A T A
----- T A T T A A A A G A G T C T C A A T A
----- T A T T A A A A G A G T C T C A A T A
----- C A T G T T A T A T T A A A A G A G T C T C A A T A
----- T A A G C A T G T T T T A T T A A A A G A G T C T C A A T A
T A A G T G A T C T G T C A T A T A A A C A T G C T A T A T T A A A A G A G T C T C A A T A
```
